# Supplementary material
Source: publisher site journal article supplement (https://www.spandidos-publications.com/5445/downloadSupplementary)

Figure S1. Immunohistochemical staining for AMIGO2 expression in cervical cancer cells invading lymphatic vessels. AMIGO2 expression in cancer cells in D2-40-positive lymphatic vessels was analyzed using serial sections in two cases. Scale bar, 100  $\mu$ m. AMIGO2, amphoterin-induced gene and open reading frame 2.

Case 1

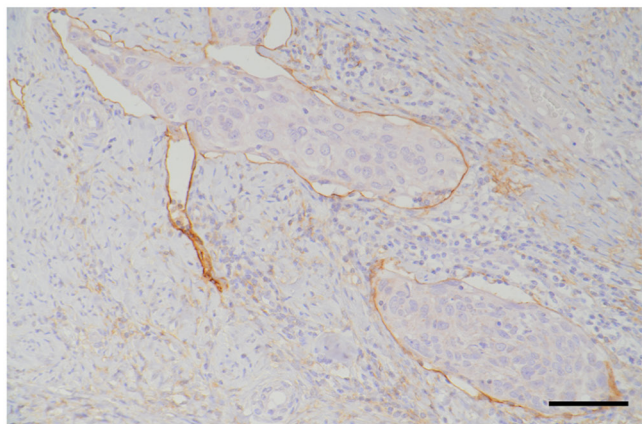

D2-40

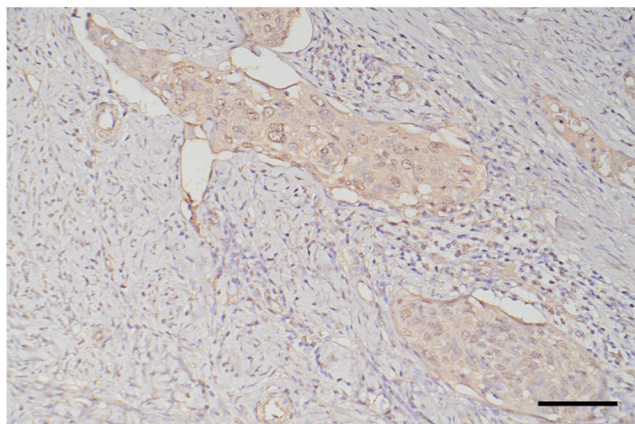

AMIGO2

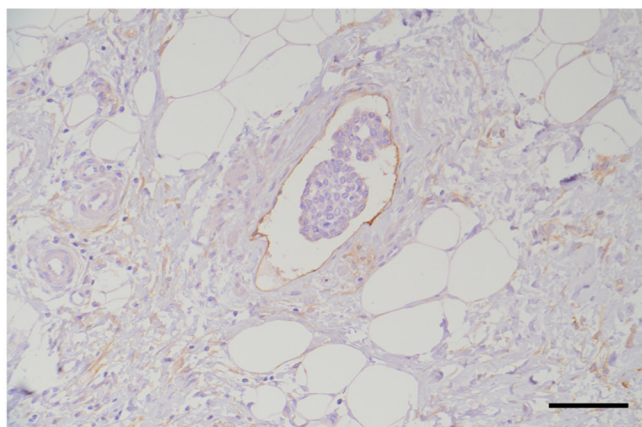

Case 2

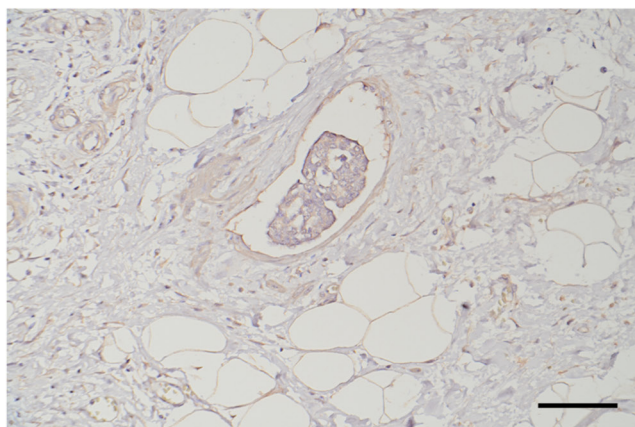

Supplement: Supplementary file 1 [file downloadSupplementary]
